# Supplementary material for: Genotoxicity profile of erinacine A-enriched Hericium erinaceus mycelium
Source: PubMed Central journal article supplement — Toxicol Rep. 2014 Nov 15;1:1195–201. doi: 10.1016/j.toxrep.2014.11.009 (PMC5598247; doi:10.1016/j.toxrep.2014.11.009), 2014-11-15
Supplement: mmc1.pdf [file mmc1.pdf]

## Supplementary Material

**Table S1.** Proximate composition (g/100g) of freeze-dried EAHE mycelium.

| <b>Proximate composition</b> | <b>Freeze-dried EAHE</b> |
|------------------------------|--------------------------|
| Moisture                     | 5.23 ± 0.24              |
| Ash                          | 10.20 ± 1.12             |
| Crude Protein                | 26.57 ± 0.86             |
| Crude Fat                    | 12.47 ± 2.61             |
| Carbohydrate                 | 45.53 ± 3.48             |

Average ± SD, n=3

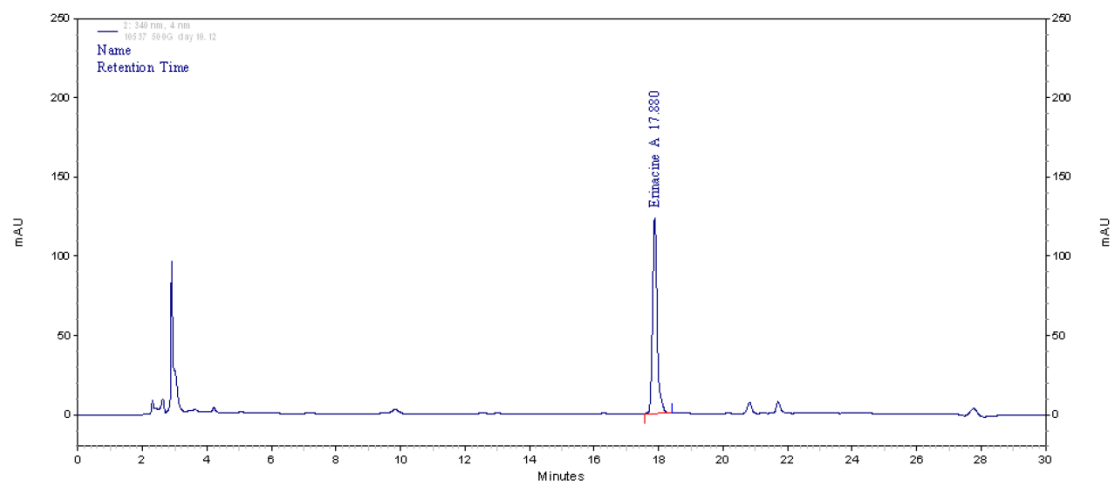

**Figure S1.** The HPLC chromatograms of the ethanol extract of erinacine A-enriched *H. erinaceus* mycelium from 20-ton bioreactor (UV detection at 340nm). Retention time of erinacine A is 17.880 min.
